# Supplementary material for: Downregulated long noncoding RNA ALDBGALG0000005049 induces inflammation in chicken muscle suffered from selenium deficiency by regulating stearoyl-CoA desaturase
Source: PubMed Central journal article supplement (PMC5581067; doi:10.18632/oncotarget.17187), 2017-04-18
Supplement: oncotarget-08-52761-s001.pdf [file oncotarget-08-52761-s001.pdf]

## **Downregulated long noncoding RNA ALDBGALG0000005049 induces inflammation in chicken muscle suffered from selenium deficiency by regulating stearyl-CoA desaturase**

### **SUPPLEMENTARY TABLES**

**Supplementary Table 1: The differently expression of lncRNAs and mRNAs**

See Supplementary File 1

**Supplementary Table 2: The potential targets of lncRNAs were predicted in cis**

See Supplementary File 2

Supplementary Table 3: The primers used in the present study

| Gene                | Forward primer               | Reverse primer               |
|---------------------|------------------------------|------------------------------|
| ALDBGALG0000000325  | 5'-GCTGTGATTCCTCCTCTGG-3'    | 5'-TCACAGTGCCCTCATCACTC-3'   |
| ALDBGALG00000003187 | 5'-CAGTGCTCATCGCTTACCAG-3'   | 5'-GCACAGGTGGAAAGAACTCA-3'   |
| ALDBGALG00000004022 | 5'-GCCTGTAAAGGGATGATGGA-3'   | 5'-GAGCAGGGACTCACAGGAAG-3'   |
| ALDBGALG00000005049 | 5'-TGACACCAAGGGTTCCTTCT-3'   | 5'-AAAGTGACTGGGCAAACACC-3'   |
| ALDBGALG00000005593 | 5'-CTTGCTTCTGTCCTGGGTGT-3'   | 5'-ATCTGCAGTGTTTTCAGCATCG-3' |
| XLOC_1170550        | 5'-TTGTCACCCAGTGTGTTTACA-3'  | 5'-ACGGCACAAAGGACTGAAAG-3'   |
| XLOC_1196171        | 5'-CTCTCTGCCACTGCTGTACG-3'   | 5'-CTACCGTTCTCTCCGTTTGC-3'   |
| PDXK                | 5'-ATCTACAGGCACCGCTAGGA-3'   | 5'-GGCAGCATCCACTTTAGGAG-3'   |
| S100A9              | 5'-TTGGTGAAGTGATGCTCCTG-3'   | 5'-AGTGGTTGTGCTGATGTTGG-3'   |
| DCX                 | 5'-GCACACGTATGAATGGGTTG-3'   | 5'-GTTGCGATAGAAACGCACCT-3'   |
| SCD                 | 5'-TACGCAAACACCCAGATGTC-3'   | 5'-AGCACAGCAACACCACTGAG-3'   |
| SLC51A              | 5'-AGATTCTCCTCCTGCTGACG-3'   | 5'-GCTGCATGTTTTCATCTGCTGT-3' |
| MTTP                | 5'-CATCCAGTGAAATGCTCCT-3'    | 5'-TCACACAGCTTTCGGATGAG-3'   |
| LRRC4C              | 5'-AGAGTTCGGATTGCTGTGCT-3'   | 5'-TGGCAGAAGCTGTGGTATTG-3'   |
| PPAR $\alpha$       | 5'-ATCCCTGGCTTCTCCAATCT-3'   | 5'-TAGGCTACCAGCATCCCATC-3'   |
| PPAR $\delta$       | 5'-CATGGAGCCCAAGTTTGTGAGT-3' | 5'-GGACGATCTCCACACAGGAT-3'   |
| PPAR $\gamma$       | 5'-CACAAGCGGAGAAGGAGAAG-3'   | 5'-TCAGCGGGAAGGACTTTATG-3'   |
| $\beta$ -actin      | 5'-CCGCTCTATGAA GGCTACGC -3' | 5'-CTCTCG GCTGTGGTGGTGAA-3'  |
